# Supplementary material for: Setd1a and NURF mediate chromatin dynamics and gene regulation during erythroid lineage commitment and differentiation
Source: PubMed Central journal article supplement — Nucleic Acids Res. 2016 May 3;44(15):7173–88. doi: 10.1093/nar/gkw327 (PMC5009724; doi:10.1093/nar/gkw327), 2016-05-03

**Setd1a and NURF mediate chromatin dynamics and gene regulation during lineage commitment and differentiation**

Ying Li<sup>1,2</sup>, Vincent P. Schulz<sup>3</sup>, Changwang Deng<sup>1</sup>, Guangyao Li<sup>4</sup>, Yong Shen<sup>1</sup>, Betsabeh Khoramian Tusi<sup>1</sup>, Gina Ma<sup>5</sup>, Jared Stees<sup>1</sup>, Yi Qiu<sup>6,7,8</sup>, Laurie A. Steiner<sup>9</sup>, Lei Zhou<sup>3,7,8</sup>, Keji Zhao<sup>10</sup>, Jörg Bungert<sup>1,7</sup>, Patrick G. Gallagher<sup>3\*</sup>, and Suming Huang<sup>1,2,7,8\*</sup>

**Table S1. Primer sequences:**

| RT primer       | sequence                                                         |
|-----------------|------------------------------------------------------------------|
| mβ-major-globin | For: CACCTTTGCCAGCCTCAGTG<br>Rev: GGTTTAGTGGTACTTGTGAGCC         |
| mβH1-globin     | For: AGTCCCCATGGAGTCAAAGA<br>Rev: CTCAAGGAGACCTTTGCTCA           |
| mεy-globin      | For: AACCTCATCAATGGCCTGTGG<br>Rev: TCAGTGGTACTTGTGGGACAGC        |
| mp4.2           | For: GGGTGAGTAGACACTTGAAATCG<br>Rev: GGGCCTCTAAGGAGTTGTG         |
| mNotch2         | For: AACTGTCAGACCCTGGTGAAC<br>Rev: CGACAAGTGTAGCCTCCAATC         |
| mβ-actin        | For: GTGGGCCGCTCTAGGCACCA<br>Rev: TGGCCTTAGGGTGCAGGGGG           |
| mTal1           | For: GAGATTTCTGATGGTCCTCAC<br>Rev: TCTTGCTTAGTTTCTTGTCTGG        |
| mGata1          | For: CAGGGATCCCATGGATTTTCCTGGTC<br>Rev: TCCACAGTTCACACACTCTCTGGC |
| mKlf1           | For: TCGCCGGAGACGCAGGCT<br>Rev: CCCAGTCCTTGTGCAGGA               |
| mBptf           | For: TTCAGGAGCCATAGTACATACAG<br>Rev: CAGAGCCGCACAGAAGTC          |

| ChIP primer | sequence                                                            |
|-------------|---------------------------------------------------------------------|
| mLCR5'      | For: ACCCAATGGACTATCCCCTGTCTC<br>Rev: GCCAATGTGATGAGTGCAGAGTTC      |
| mHS2        | For: TGCAGTACCACTG TCCAAGG<br>Rev: ATCTGGCCACACACCCTAAG             |
| mHS6        | For: ATTCTCTGCTGTATTCACTGG<br>Rev: CCTCATCTTTCAACAATGCTCTG          |
| mεy pro.    | For: CAAAGAGAGTTTTTGTGAAGGAGGAG<br>Rev: AAAGTTCACCATGATGGCAAGTCTGG  |
| mβH1 pro.   | For: CAAGGTCCAGGGTGAAGAATAAAAGG<br>Rev: CAGGAGCCTAAGACATAGTGCATTAGC |
| mβ maj pro. | For: AAGCCTGATTCCGTAGAGCCACAC<br>Rev: CCCACAGGCAAGAGACAGCAGC        |

|               |                                                              |
|---------------|--------------------------------------------------------------|
| mβ min pro.   | For: TGCCCACTCTGTCCTCTC<br>Rev: CCTGTGTAGATATGGTTGTCATC      |
| mβ min 3'     | For: AGCCCAAGAGCATTGAGTTGTATC<br>Rev: TCAGACTGTGGAGGAGGAGGAG |
| mp4.2 pro     | For: GCAGGTCATCTCCAAAGAGC<br>Rev: CGAACCCAACTCTGAACCTC       |
| mp4.2 3'UTR   | For: TCTTTCCCTGGTGGCTATTG<br>Rev: AGAGTACCCCGAAAACACC        |
| mNotch2 pro.  | For: TGGATGGACGGATGAATG<br>Rev: GAGACTGTCAACGGAAGG           |
| mNotch2 3'UTR | For: GAATGTACGAGGACTGTT<br>Rev: GAGGAAGTTGCCATAGTA           |
| mMyoD         | For: TGCCTGTCCAGCATAGTG<br>Rev: ACTCTGGTGGTGCATCTG           |

| 3C primer     | sequence                                                     |
|---------------|--------------------------------------------------------------|
| mHS2/3        | ACATGAGGCTACTCTATTGTCAGACTGTGC                               |
| mHS2          | ATGACTCAGCACTGCTGTGCTCAAGCC                                  |
| mβH1 pro.     | TCAGGAATGTTCCCAACTTTCACTCAATTCCCC                            |
| mβ maj pro.   | GGTGGAAAGGGGTATTATGAACATTCGG                                 |
| m-3'distal    | TAGCTGTGGAGAGCAGGAGGTCTGCTAATGCC                             |
| mHS2-BglII    | For: TCCTACACATTAACGAGCCTCTG<br>Rev: GCTAACCTCCTCTGCCCTTG    |
| β maj-Bgl II  | For: GCCTAGCCATAAAGATAGGATGAG<br>Rev: AGCCACCAGCACTGTCTG     |
| m β h1-Bgl II | For: AAGCCACAATATAGAATTACATCC<br>Rev: AATGTCTCAGTCTCACAAGATG |

### Supplemental Figure Legends:

**Figure S1. Loss of Setd1a in erythroid compartment resulted in impaired H3K4me3 and BPTF recruitment at erythroid gene promoters.** ChIP analysis of H3K4me3 enrichment (**A**), ASH2L occupancy (**B**), and BPTF recruitment (**C**) at p4.2 promoter comparing *Setd1a<sup>fl/fl</sup>* and Setd1a CKO BM cells. Data are shown as mean ± SD. \*P<0.05; \*\*P<0.01.

**Fig S2. Consistent colocalization of genome wide USF1 and USF2 binding.** Two replicates of ChIP-seq analyses of USF1 and USF2 binding at the *β-globin* locus.

**Figure S3. USF1, USF2, BPTF and H3K4me3 ChIP-seq signal are colocalized at transcription start sites (TSSs) and correlate with transcription levels in human primary erythroid cells.** (A) Heatmaps represent USF1, USF2, BPTF and H3K4me3 ChIP enrichment at TSSs in R3/R4 erythroid cells. (B) Line-plots for USF1, USF2, BPTF and H3K4me3 ChIP enrichment at TSSs correlates with gene expression in R3/R4 erythroid cells (GEO accession number: GSE53983).

**Figure S4. Directed differentiation of erythroid progenitors/precursors from murine embryonic stem cells (mESCs).** (A) Schematic outline of induced erythroid differentiation of murine ES cells. (B) qRT-PCR analysis of the expression patterns of genes that are specifically expressed in definitive erythroid cells during EB differentiation. (C) qRT-PCR analysis of expression patterns of embryonic and adult globin genes during EB differentiation comparing the control and *Setd1a* KD cells. Data are shown as mean  $\pm$  SD. \*P<0.05; \*\*P<0.01. (D) The 19-day differentiated EBs exhibited reddish color (Left). HEMA staining of erythroblast cells in differentiated ES cells at different days (Right).

**Figure S5. Depletion of *Setd1a* suppresses erythroid gene *p4.2* and *Notch2* transcription.** (A) Stable ESC clones harboring vector control or shSet1d1a-expressing constructs were induced with EPO and other cytokines for erythroid differentiation and total RNA was extracted at day 0, 4, and 19. The *p4.2* (Top) and *Notch2* (Bottom) transcripts were analyzed by qRT-PCR and normalized with  $\beta$ -actin. (B) ChIP analysis of H3K4me3 on *p4.2* (Top) and *Notch2* (Bottom)

promoters at day 19 in control and *Setd1a* KD cells. Data are shown as mean  $\pm$  SD. \*P<0.05; \*\*P<0.01.

**Figure S6. *Setd1a* is required for  $\beta$ -globin transcription and chromatin accessibility at the  $\beta$ -globin locus during MEL cell differentiation.** (A) Western blot of *Setd1a* expression in *Setd1a* KD MEL cells compared to control,  $\beta$ -actin, as a loading control. (B) qRT-PCR analysis of expression levels of genes required for erythroid differentiation, *Tall* and *p4.2*, upon the *Setd1a* KD. (C)  $\beta$ -major globin transcripts were analyzed by qRT-PCR and normalized with  $\beta$ -actin in *Setd1a* KD MEL cells upon DMSO differentiation for 5 days. (D and E) ChIP analysis of H3K4me3 (D) and SNF2L recruitment (E) over the  $\beta$ -globin locus at days 5 upon *Setd1a* KD. (F) FAIRE assay on  $\beta$ -globin locus at days 5 upon *Setd1a* KD MEL cells. Data are shown as mean  $\pm$  SD. \*P<0.05; \*\*P<0.01.

**Figure S7. Loss of *Setd1a* disrupts enhancer /promoter interaction over  $\beta$ -globin locus during MEL cells differentiation.** (A) and (B) The 3C analysis of the interaction between the HS2/3 or HS2 enhancer and  $\beta$ -globin promoters in the  $\beta$ -globin locus at DMSO-induced MEL cells upon *Setd1a* KD. Data are shown as PCR quantitation of the 3C products. Data are shown as mean  $\pm$  SEM. \*P<0.05; \*\*P<0.01.

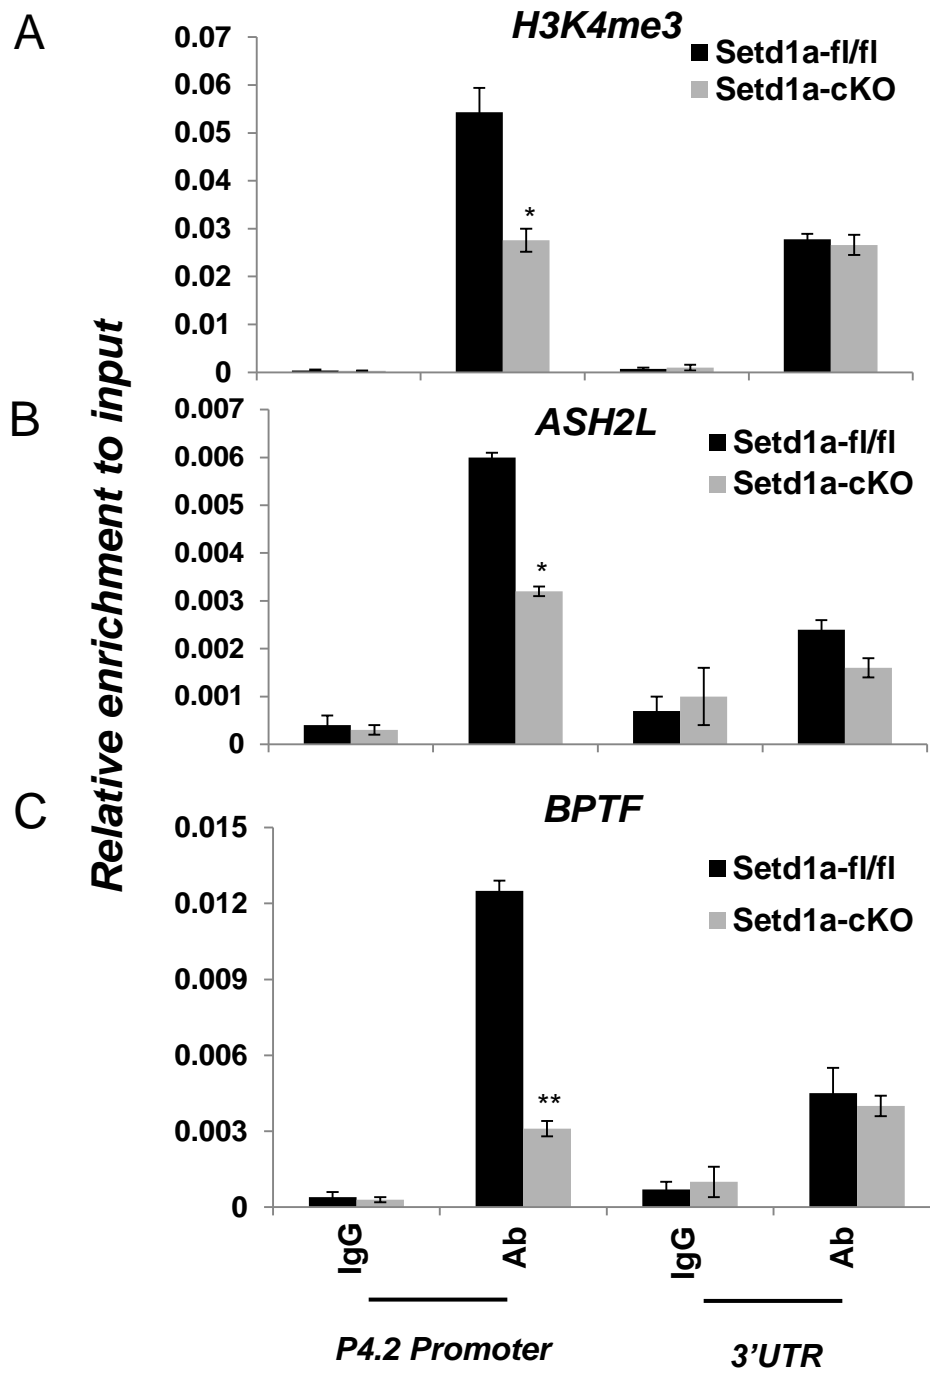

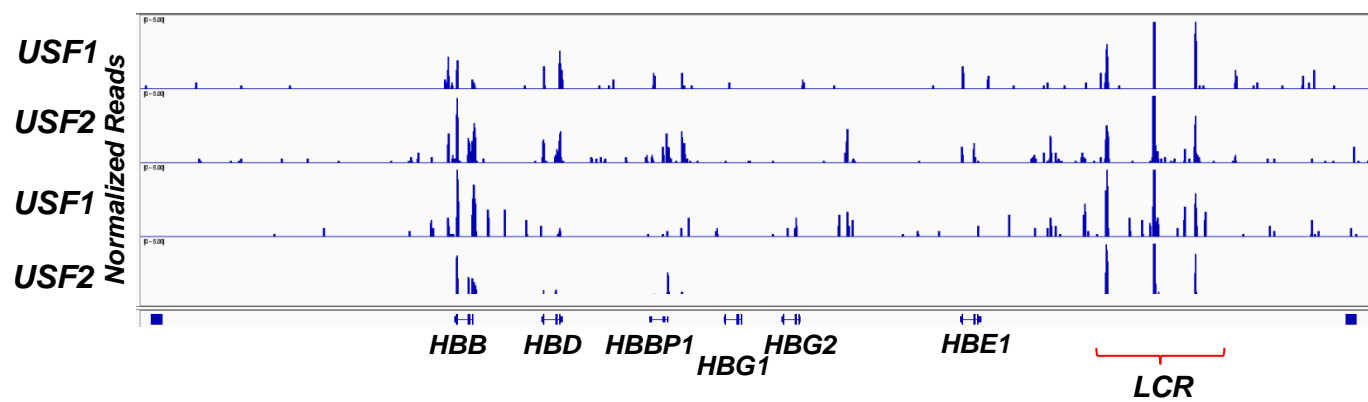

**USF1**

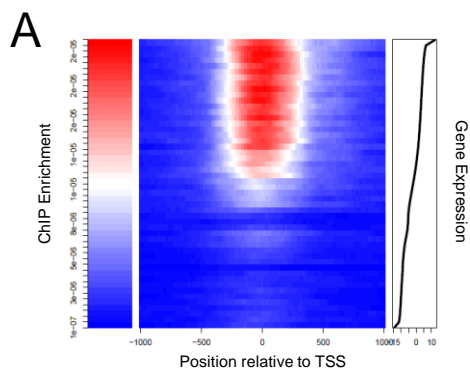

**USF2**

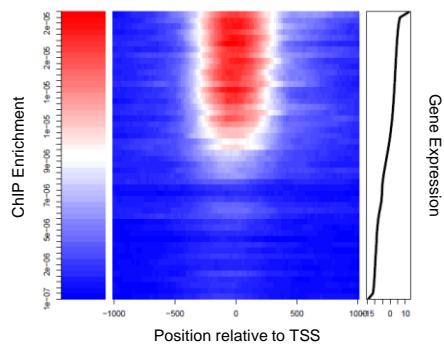

**BPTF**

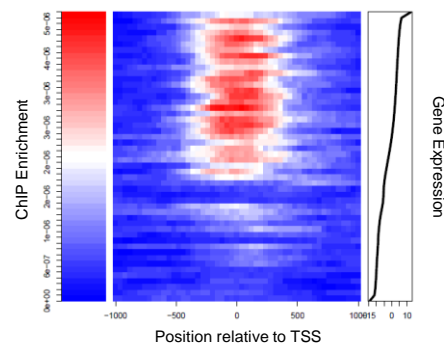

**H3K4me3**

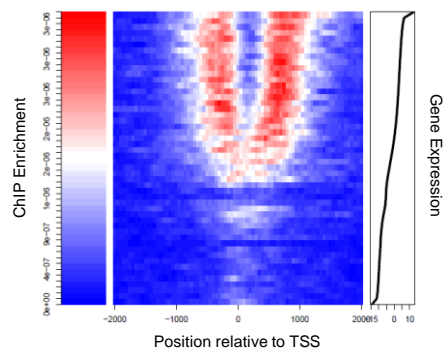

**B**

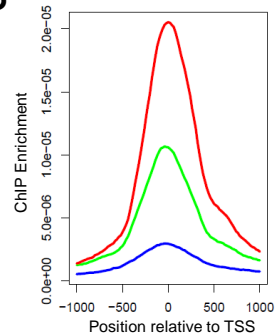

— High expression  
— Moderate expression  
— Low expression

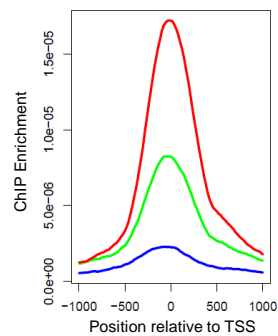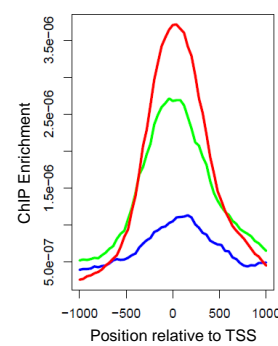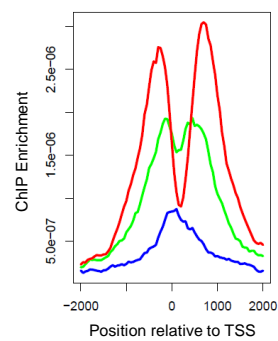

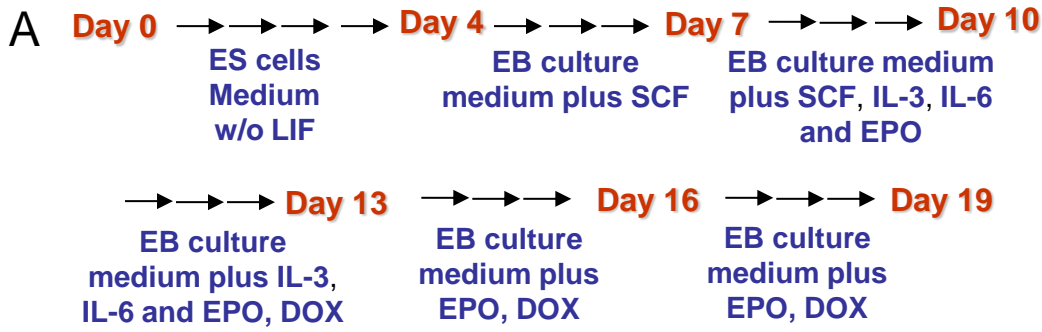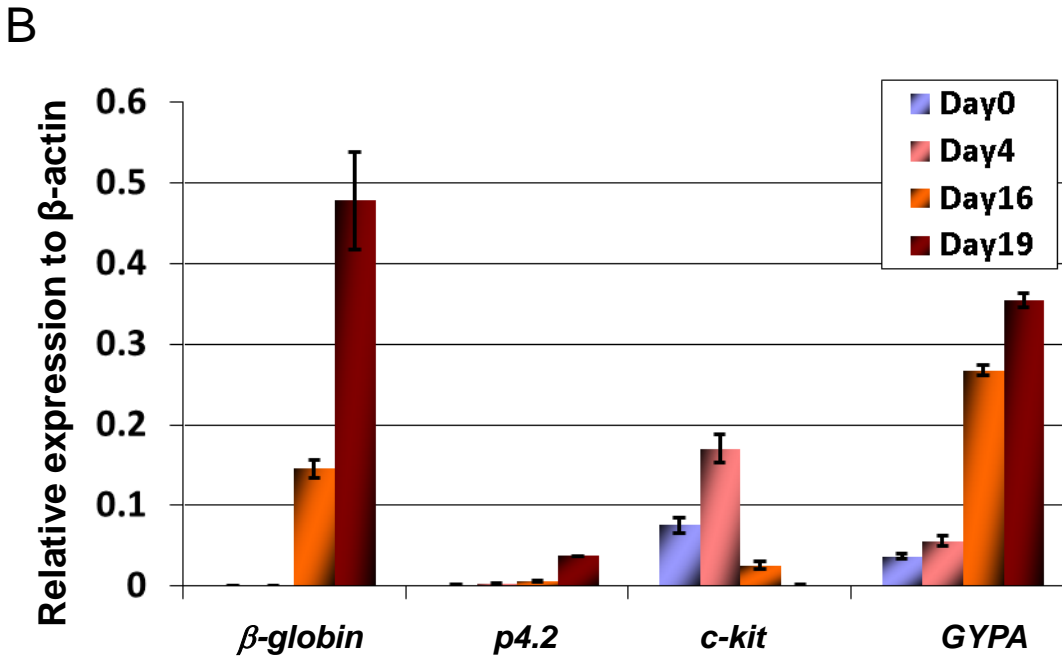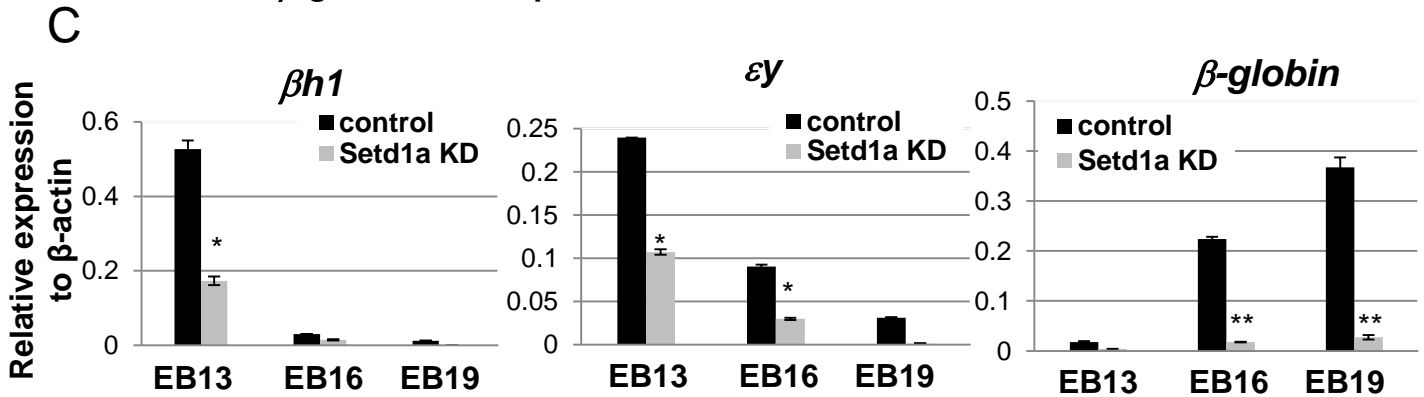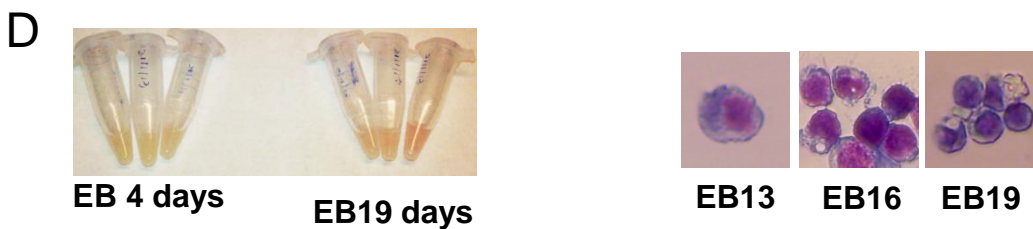



A

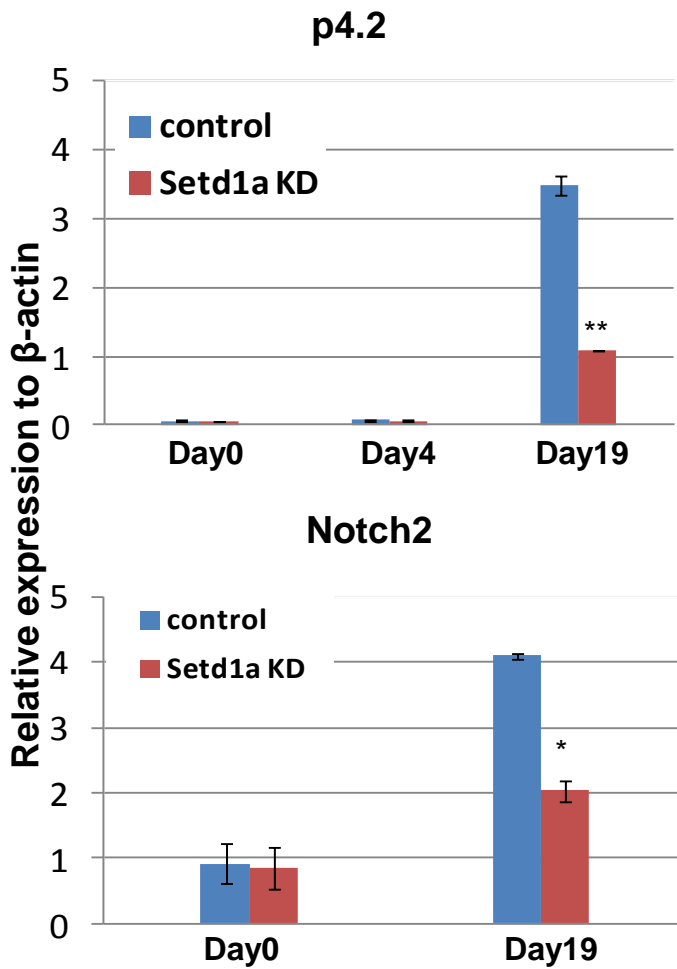

B

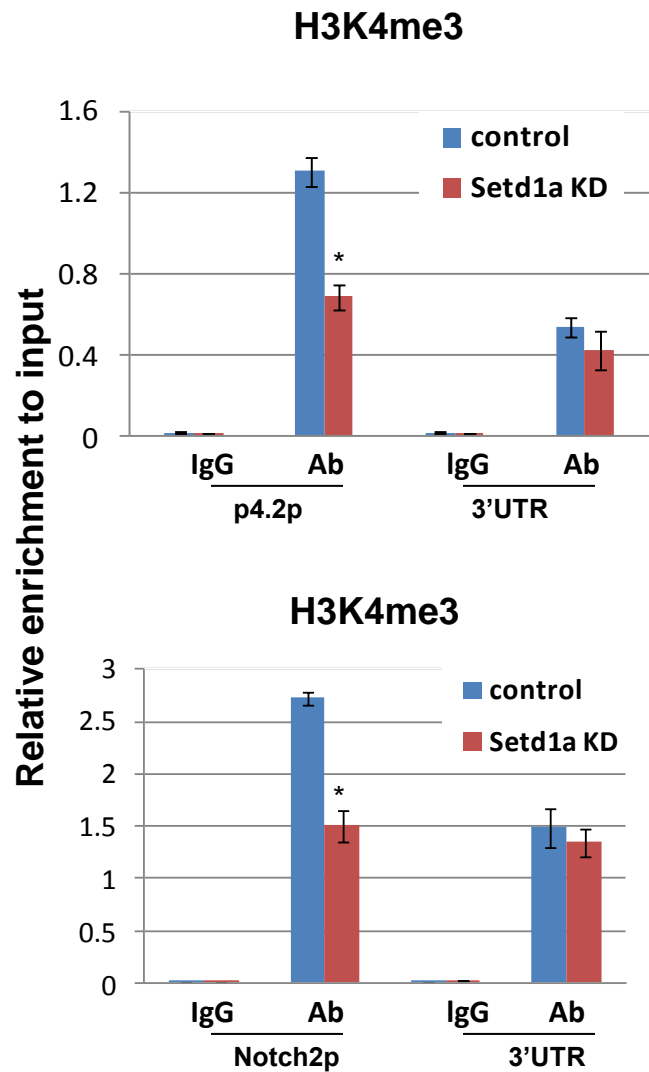

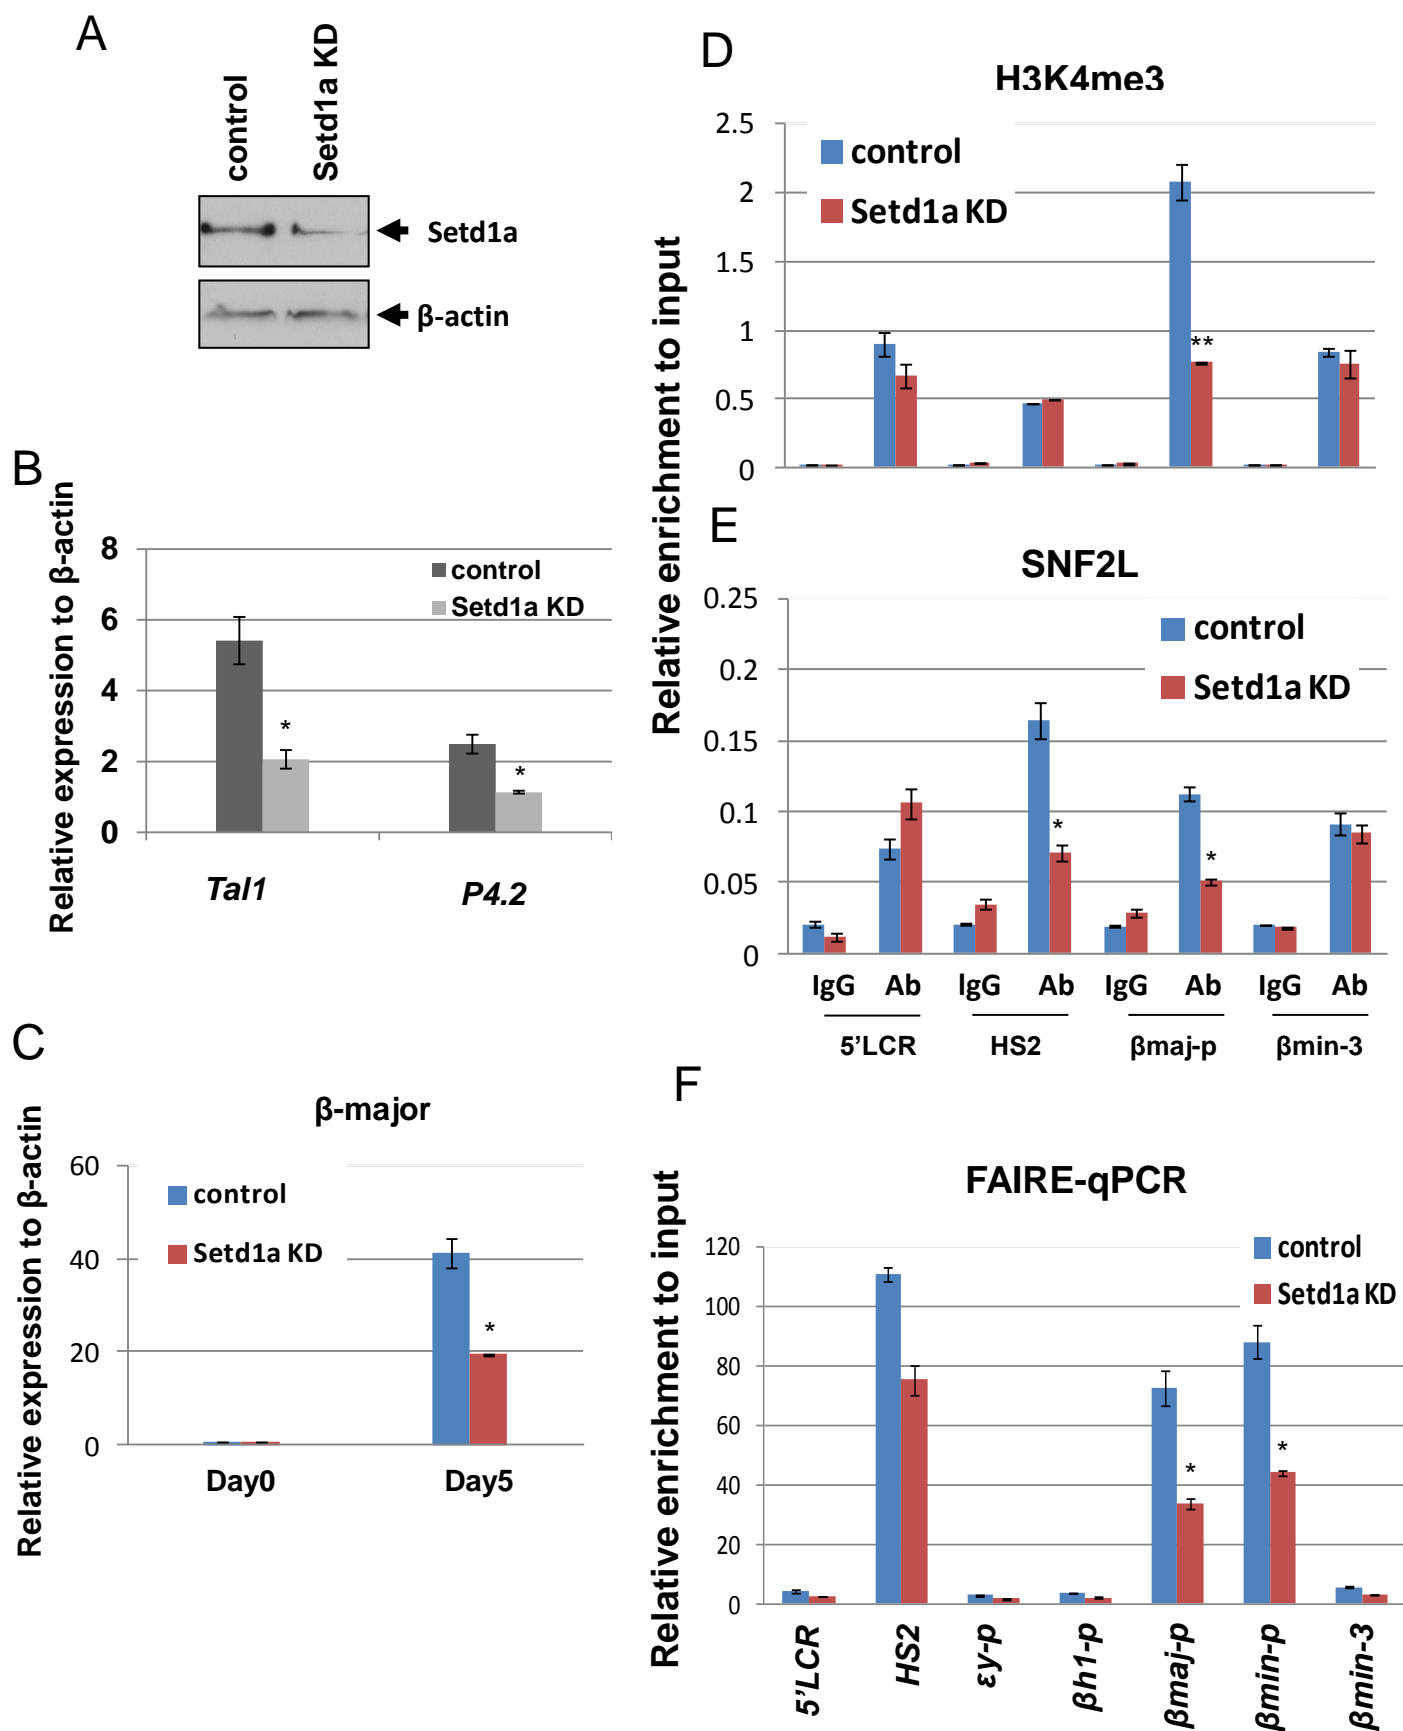

A

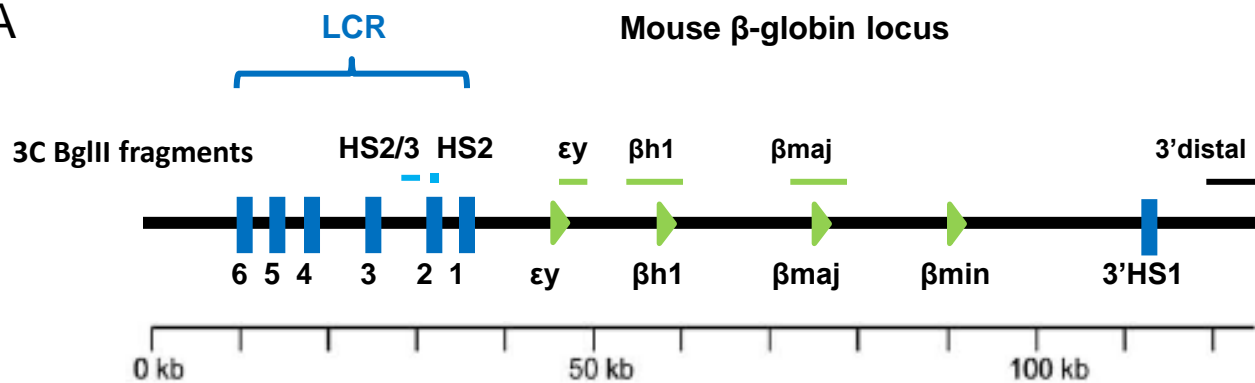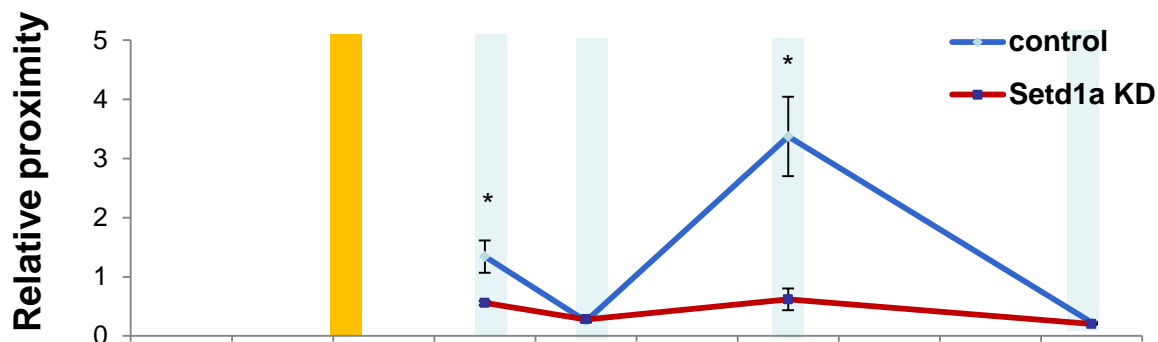

B

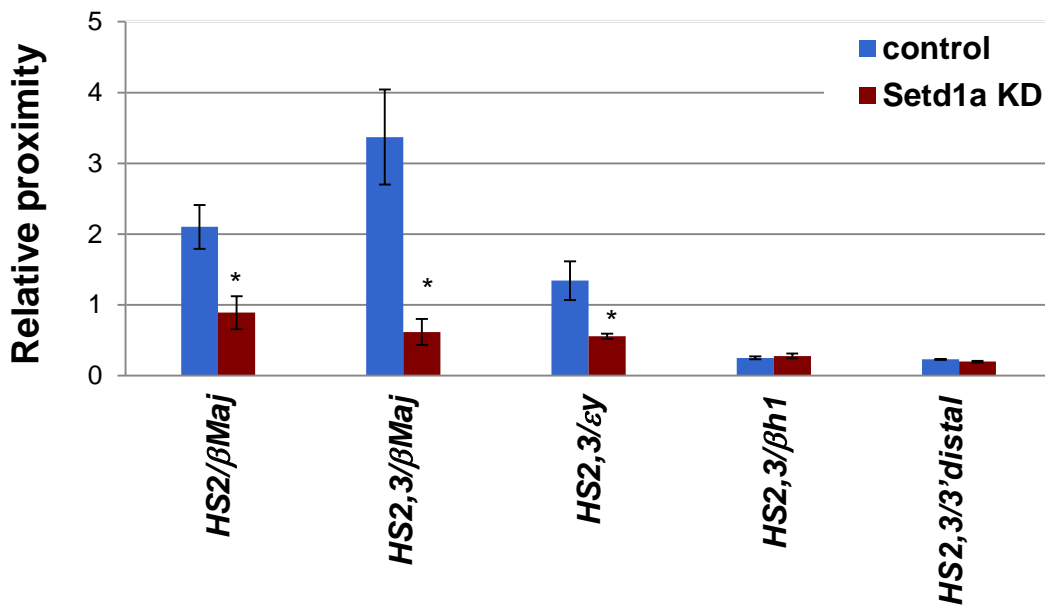

Supplement: supp_gkw327_nar-00912-v-2016-File003.pdf [file supp_gkw327_nar-00912-v-2016-File003.pdf]
